# Supplementary material for: The Allosteric Activation of α7 nAChR by α-Conotoxin MrIC Is Modified by Mutations at the Vestibular Site
Source: Toxins (Basel). 2021 Aug 10;13(8):555. doi: 10.3390/toxins13080555 (PMC8402416; doi:10.3390/toxins13080555)
Supplement: Supplementary file 1 [file toxins-13-00555-s001.zip › toxins-1258977 supplementary 3.pdf]

# Supplementary Materials: The Allosteric Activation of $\alpha 7$ nAChR by $\alpha$ -conotoxin MrIC is Modified by Mutations at the Vestibular Site

Alican Gulsevin, Roger L. Papke, Clare Stokes, Hue N. T. Tran, Aihua H. Jin, Aihua H Jin and Jens Meiler

**Table S1.** The average scores and standard deviations (S.D.) calculated for the ten lowest-scoring poses from the WT, G83V, A102V, and T106A peptide docking calculations. All units are in Rosetta Energy Units (REU).

| Protein | Average Score (REU) | S.D. (REU) |
|---------|---------------------|------------|
| WT      | -25.9               | 0.8        |
| G83V    | -28.7               | 0.8        |
| A102V   | -28.0               | 0.6        |
| T106A   | -26.8               | 1.0        |

**Table S2.** The Shapiro-Wilk test statistic values and the p-values calculated for the different MrIC, GAT107, and PNU-120596 applications at different mutations to test whether the measurements fall within normal distribution. A p-value > 0.05 indicates a normal distribution for the set of measurements and a p-value < 0.05 indicates a non-normal distribution for the set of measurements.

| Application                           | Shapiro Test Statistic | Shapiro p-value |
|---------------------------------------|------------------------|-----------------|
| WT MrIC + PNU                         | 0.599909306            | 0.0004576       |
| WT MrIC + PNU + TMP-TQS               | 0.859702408            | 0.227181956     |
| $\alpha 7$ C190A GAT107               | 0.963213861            | 0.845787644     |
| $\alpha 7$ C190A GAT107 + TMP-TQS     | 0.95107913             | 0.739512026     |
| $\alpha 7$ C190A MrIC + PNU           | 0.945044458            | 0.700046778     |
| $\alpha 7$ C190A MrIC + PNU + TMP-TQS | 0.805926859            | 0.046861239     |
| $\alpha 7$ G83V MrIC + PNU            | 0.871676564            | 0.304304093     |
| $\alpha 7$ G83V PNU                   | 0.94775176             | 0.709198117     |
| $\alpha 7$ A102V MrIC + PNU           | 0.669861794            | 0.002928978     |
| $\alpha 7$ A102V PNU                  | 0.802413106            | 0.043275245     |
| $\alpha 7$ T106A MrIC + PNU           | 0.625163436            | 0.000912655     |
| $\alpha 7$ T106A PNU                  | 0.633596778            | 0.000668759     |

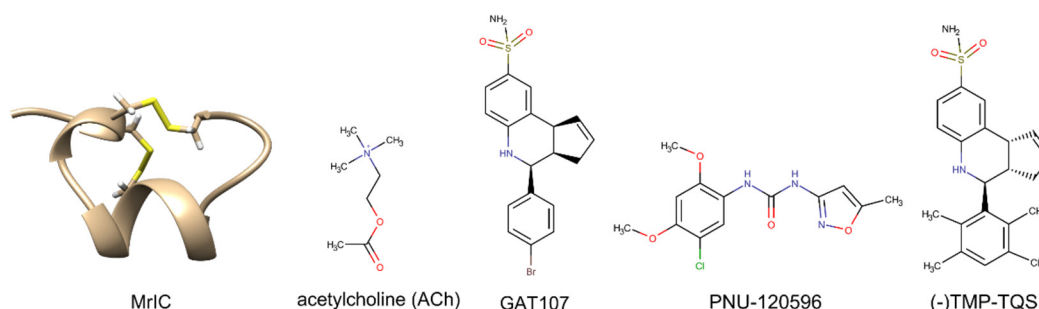

**Figure S1.** The structures of an MrIC model, ACh, GAT107, PNU-120596, and (-)TMP-TQS that were used in the experimental and computational studies.

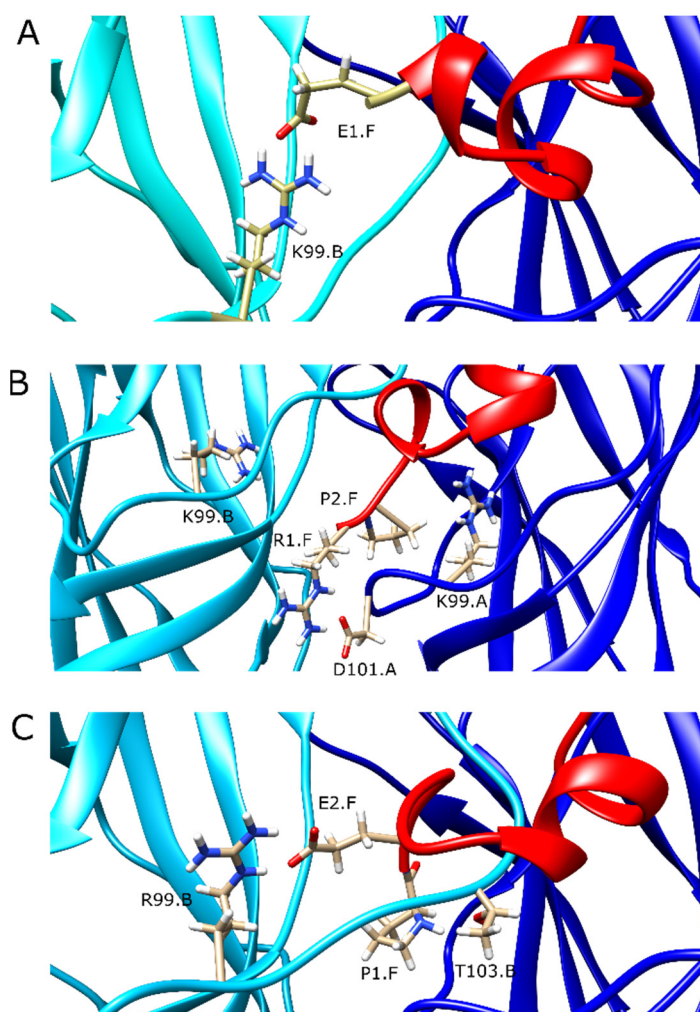

**Figure S2.** The interactions between MrIA (A), MrIB (B), and MrIC (C) and the vestibular residues. Chain A (blue) indicates subunit A, chain B (cyan) indicates subunit B, and chain F (red) indicates MrIC. The residues important for  $\alpha 7$  nAChR – MrIC interactions are shown explicitly.

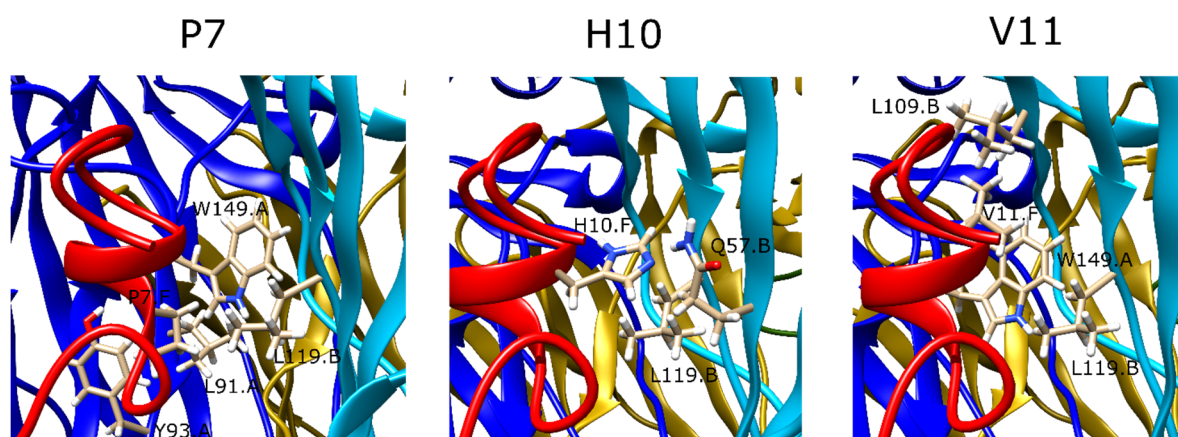

**Figure S3.** The lowest-scoring docking pose of MrIC at the WT  $\alpha 7$  nAChR orthosteric site viewed with the important interactions that interact with P7MrIC (left), H10MrIC (middle), and V11MrIC (right) labeled. Chain A (blue) stands for the positive subunit of the interface bearing the C-loop, chain B (cyan) stands for the negative subunit of the interface, and chain F (red) stands for the peptide.

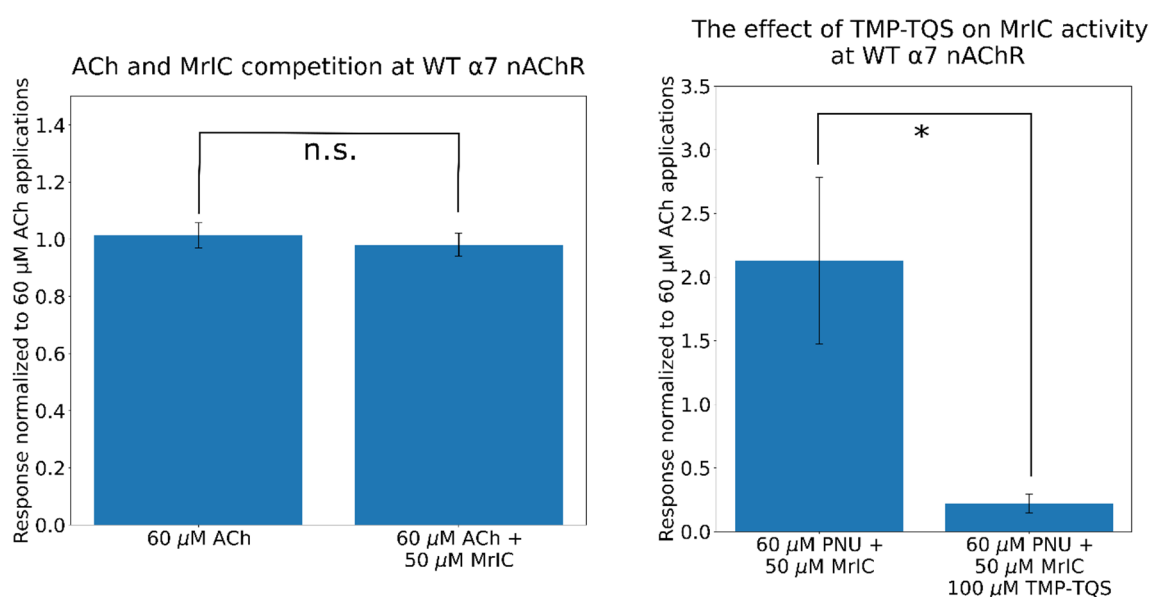

**Figure S4.** The effect of 50  $\mu$ M MrIC application on the activity of 60  $\mu$ M ACh at WT  $\alpha 7$  nAChR (n=7) (A), and the effect of 100  $\mu$ M (-)TMP-TQS (n=6) on the potentiated response evoked by 60  $\mu$ M PNU-120596 + 50  $\mu$ M MrIC (n=7) at WT  $\alpha 7$  nAChR. All responses were normalized to the responses evoked by 60  $\mu$ M ACh applications. n.s. stands for not significant, \* stands for  $p < 0.05$ , \*\* stands for  $p < 0.01$ , \*\*\* stands for  $p < 0.001$ , and \*\*\*\* stands for  $p < 0.0001$ .

### The effect of MrIC on WT $\alpha 7$ nAChR

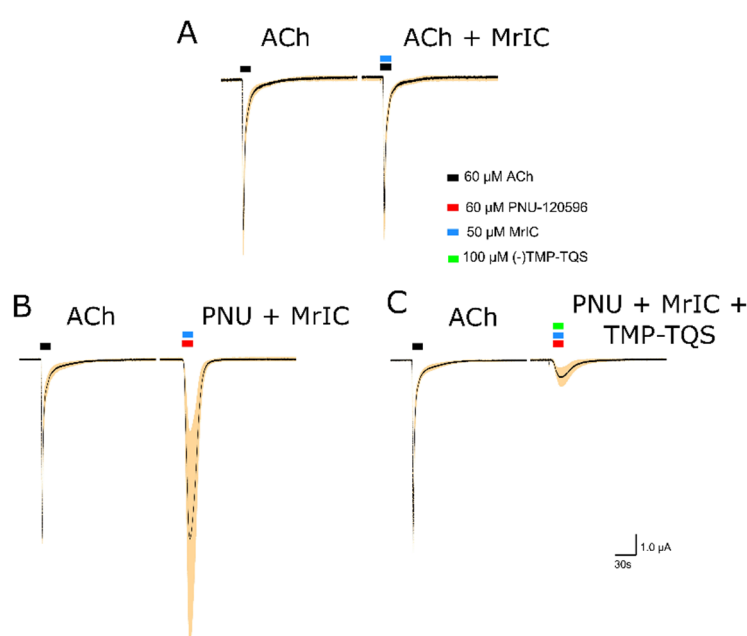

**Figure S5.** The current traces measured for (A) 60  $\mu$ M ACh and 60  $\mu$ M ACh + 50  $\mu$ M MrIC applications, (B) 60  $\mu$ M ACh and 60  $\mu$ M PNU-120596 + 50  $\mu$ M MrIC, and (C) 60  $\mu$ M ACh and 60  $\mu$ M PNU-120596 + 50  $\mu$ M MrIC + 100  $\mu$ M (-)TMP-TQS applications. The x-axis stands for the time scale of the measurement and the y-axis stands for the current induced by each application. Black bars indicate the application time of 60  $\mu$ M ACh, red bars indicate the application time of 60  $\mu$ M PNU-

120596, blue bars indicate the application time of 50  $\mu$ M MrIC, and green bars indicate the application time of 100  $\mu$ M (-)TMP-TQS. See the Materials and Methods section for a more detailed explanation on the measurements and how the error bands are calculated.

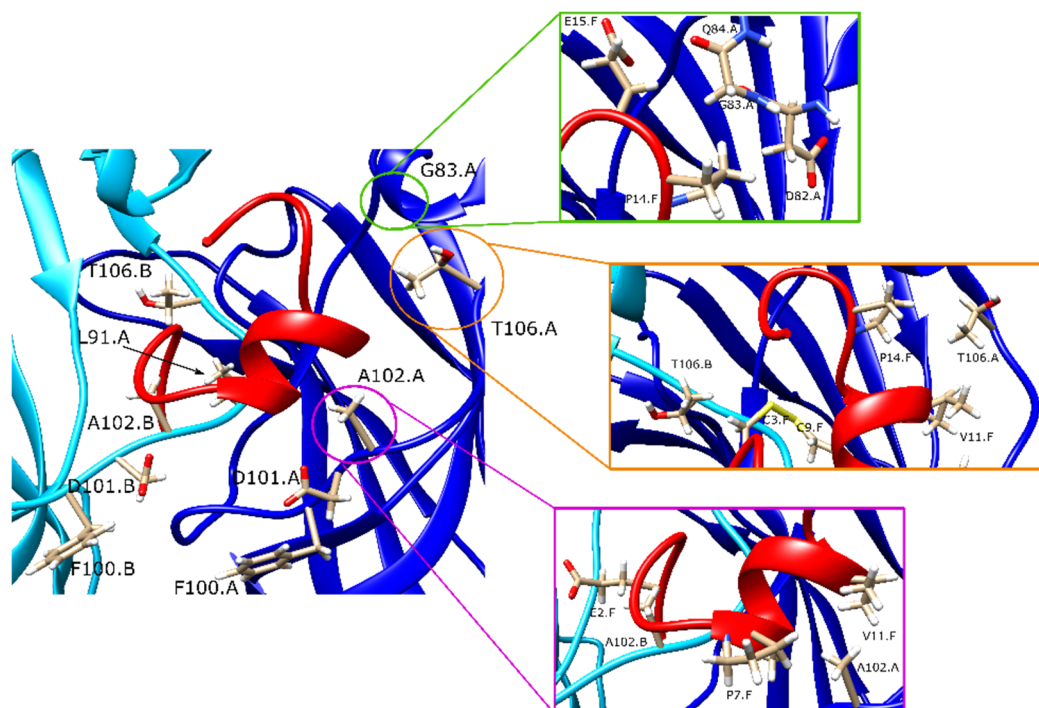

**Figure S6.** The lowest-scoring MrIC pose at the WT  $\alpha 7$  nAChR AA site and the peptide-protein interactions at the vicinity of the residues G83 (green box), T106 (orange box), and A102 (purple box). The chain A (blue) indicates subunit A, the chain B (cyan) indicates subunit B, and the chain F (red) indicates MrIC. The residues important for  $\alpha 7$  nAChR – MrIC interactions are shown explicitly.

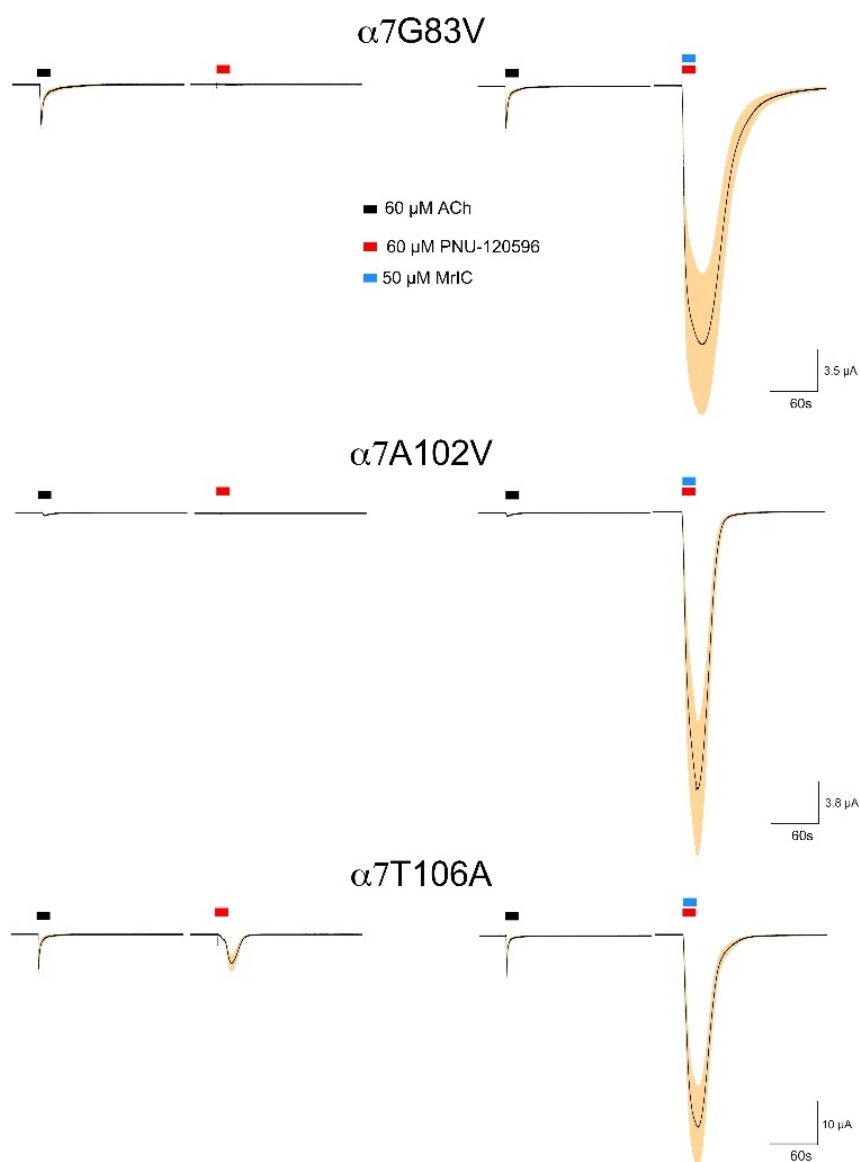

**Figure S7.** The current traces measured for  $\alpha 7G83V$  (top),  $\alpha 7A102V$  (middle), and  $\alpha 7T106A$  mutations. The left panels show the current induced by standalone application of 60  $\mu M$  ACh (black) and 60  $\mu M$  PNU-120596 (red). The right panels show the current induced by the 60  $\mu M$  ACh control application (black) and the 60  $\mu M$  PNU-120596 + 50  $\mu M$  MrIC application. The x-axis stands for the time scale of the measurement and the y-axis stands for the current induced by each application. See the Materials and Methods section for a more detailed explanation on the measurements and how the error bands are calculated.
